# Supplementary material
Source: Springer Nature journal article supplement (https://www.springermedizin.de/resource/supplementary/13063_2014_2330_MOESM2_ESM.pdf/9621934)

# Use of Trial T intervention T1 in patients not co-enrolled in Trial T

Sample size per group

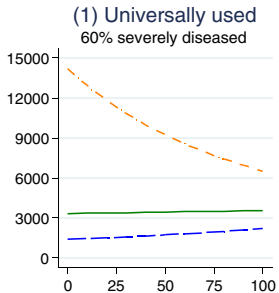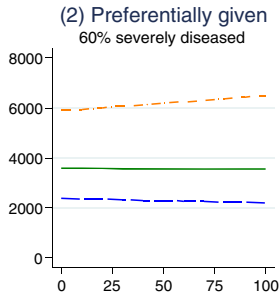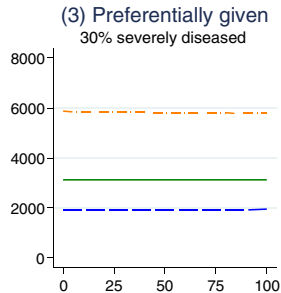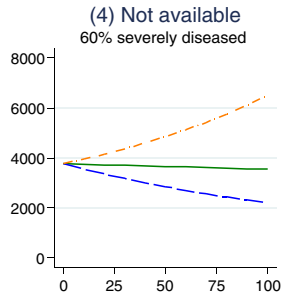

Percentage of Trial S patients co-enrolled into Trial T

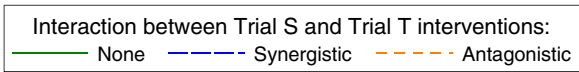

Supplement: MOESM2 [file 9621934]
